# Supplementary material for: Repurposing Benzimidazoles against Causative Agents of Chromoblastomycosis: Albendazole Has Superior In Vitro Activity Than Mebendazole and Thiabendazole
Source: MDPI journal article supplement (doi:10.3390/jof9070753), 2023-07-16
Supplement: s1 [file s1]

(A) albendazole (ALB) x itraconazole (ITZ) (μM)

|   | 1  | 2                            | 3                            | 4                            | 5                           | 6                           | 7                           | 8                           | 9                           | 10                           | 11                            | 12            |
|---|----|------------------------------|------------------------------|------------------------------|-----------------------------|-----------------------------|-----------------------------|-----------------------------|-----------------------------|------------------------------|-------------------------------|---------------|
| A | NC | ALB<br>64.0<br>ITZ<br>4.0    | ALB<br>32.0<br>ITZ<br>4.0    | ALB<br>16.0<br>ITZ<br>4.0    | ALB<br>8.0<br>ITZ<br>4.0    | ALB<br>4.0<br>ITZ<br>4.0    | ALB<br>2.0<br>ITZ<br>4.0    | ALB<br>1.0<br>ITZ<br>4.0    | ALB<br>0.5<br>ITZ<br>4.0    | ALB<br>0.25<br>ITZ<br>4.0    | ALB<br>0.125<br>ITZ<br>4.0    | ITZ<br>4.0    |
| B | NC | ALB<br>64.0<br>ITZ<br>2.0    | ALB<br>32.0<br>ITZ<br>2.0    | ALB<br>16.0<br>ITZ<br>2.0    | ALB<br>8.0<br>ITZ<br>2.0    | ALB<br>4.0<br>ITZ<br>2.0    | ALB<br>2.0<br>ITZ<br>2.0    | ALB<br>1.0<br>ITZ<br>2.0    | ALB<br>0.5<br>ITZ<br>2.0    | ALB<br>0.25<br>ITZ<br>2.0    | ALB<br>0.125<br>ITZ<br>2.0    | ITZ<br>2.0    |
| C | NC | ALB<br>64.0<br>ITZ<br>1.0    | ALB<br>32.0<br>ITZ<br>1.0    | ALB<br>16.0<br>ITZ<br>1.0    | ALB<br>8.0<br>ITZ<br>1.0    | ALB<br>4.0<br>ITZ<br>1.0    | ALB<br>2.0<br>ITZ<br>1.0    | ALB<br>1.0<br>ITZ<br>1.0    | ALB<br>0.5<br>ITZ<br>1.0    | ALB<br>0.25<br>ITZ<br>1.0    | ALB<br>0.125<br>ITZ<br>1.0    | ITZ<br>1.0    |
| D | NC | ALB<br>64.0<br>ITZ<br>0.5    | ALB<br>32.0<br>ITZ<br>0.5    | ALB<br>16.0<br>ITZ<br>0.5    | ALB<br>8.0<br>ITZ<br>0.5    | ALB<br>4.0<br>ITZ<br>0.5    | ALB<br>2.0<br>ITZ<br>0.5    | ALB<br>1.0<br>ITZ<br>0.5    | ALB<br>0.5<br>ITZ<br>0.5    | ALB<br>0.25<br>ITZ<br>0.5    | ALB<br>0.125<br>ITZ<br>0.5    | ITZ<br>0.5    |
| E | NC | ALB<br>64.0<br>ITZ<br>0.25   | ALB<br>32.0<br>ITZ<br>0.25   | ALB<br>16.0<br>ITZ<br>0.25   | ALB<br>8.0<br>ITZ<br>0.25   | ALB<br>4.0<br>ITZ<br>0.25   | ALB<br>2.0<br>ITZ<br>0.25   | ALB<br>1.0<br>ITZ<br>0.25   | ALB<br>0.5<br>ITZ<br>0.25   | ALB<br>0.25<br>ITZ<br>0.25   | ALB<br>0.125<br>ITZ<br>0.25   | ITZ<br>0.25   |
| F | NC | ALB<br>64.0<br>ITZ<br>0.125  | ALB<br>32.0<br>ITZ<br>0.125  | ALB<br>16.0<br>ITZ<br>0.125  | ALB<br>8.0<br>ITZ<br>0.125  | ALB<br>4.0<br>ITZ<br>0.125  | ALB<br>2.0<br>ITZ<br>0.125  | ALB<br>1.0<br>ITZ<br>0.125  | ALB<br>0.5<br>ITZ<br>0.125  | ALB<br>0.25<br>ITZ<br>0.125  | ALB<br>0.125<br>ITZ<br>0.125  | ITZ<br>0.125  |
| G | NC | ALB<br>64.0<br>ITZ<br>0.0625 | ALB<br>32.0<br>ITZ<br>0.0625 | ALB<br>16.0<br>ITZ<br>0.0625 | ALB<br>8.0<br>ITZ<br>0.0625 | ALB<br>4.0<br>ITZ<br>0.0625 | ALB<br>2.0<br>ITZ<br>0.0625 | ALB<br>1.0<br>ITZ<br>0.0625 | ALB<br>0.5<br>ITZ<br>0.0625 | ALB<br>0.25<br>ITZ<br>0.0625 | ALB<br>0.125<br>ITZ<br>0.0625 | ITZ<br>0.0625 |
| H | NC | ALB<br>64.0                  | ALB<br>32.0                  | ALB<br>16.0                  | ALB<br>8.0                  | ALB<br>4.0                  | ALB<br>2.0                  | ALB<br>1.0                  | ALB<br>0.5                  | ALB<br>0.25                  | ALB<br>0.125                  | PC            |

(B) albendazole (ALB) x terbinafine (TRB) (μM)

|   | 1  | 2                            | 3                            | 4                            | 5                           | 6                           | 7                           | 8                           | 9                           | 10                           | 11                            | 12            |
|---|----|------------------------------|------------------------------|------------------------------|-----------------------------|-----------------------------|-----------------------------|-----------------------------|-----------------------------|------------------------------|-------------------------------|---------------|
| A | NC | ALB<br>64.0<br>TRB<br>4.0    | ALB<br>32.0<br>TRB<br>4.0    | ALB<br>16.0<br>TRB<br>4.0    | ALB<br>8.0<br>TRB<br>4.0    | ALB<br>4.0<br>TRB<br>4.0    | ALB<br>2.0<br>TRB<br>4.0    | ALB<br>1.0<br>TRB<br>4.0    | ALB<br>0.5<br>TRB<br>4.0    | ALB<br>0.25<br>TRB<br>4.0    | ALB<br>0.125<br>TRB<br>4.0    | TRB<br>4.0    |
| B | NC | ALB<br>64.0<br>TRB<br>2.0    | ALB<br>32.0<br>TRB<br>2.0    | ALB<br>16.0<br>TRB<br>2.0    | ALB<br>8.0<br>TRB<br>2.0    | ALB<br>4.0<br>TRB<br>2.0    | ALB<br>2.0<br>TRB<br>2.0    | ALB<br>1.0<br>TRB<br>2.0    | ALB<br>0.5<br>TRB<br>2.0    | ALB<br>0.25<br>TRB<br>2.0    | ALB<br>0.125<br>TRB<br>2.0    | TRB<br>2.0    |
| C | NC | ALB<br>64.0<br>TRB<br>1.0    | ALB<br>32.0<br>TRB<br>1.0    | ALB<br>16.0<br>TRB<br>1.0    | ALB<br>8.0<br>TRB<br>1.0    | ALB<br>4.0<br>TRB<br>1.0    | ALB<br>2.0<br>TRB<br>1.0    | ALB<br>1.0<br>TRB<br>1.0    | ALB<br>0.5<br>TRB<br>1.0    | ALB<br>0.25<br>TRB<br>1.0    | ALB<br>0.125<br>TRB<br>1.0    | TRB<br>1.0    |
| D | NC | ALB<br>64.0<br>TRB<br>0.5    | ALB<br>32.0<br>TRB<br>0.5    | ALB<br>16.0<br>TRB<br>0.5    | ALB<br>8.0<br>TRB<br>0.5    | ALB<br>4.0<br>TRB<br>0.5    | ALB<br>2.0<br>TRB<br>0.5    | ALB<br>1.0<br>TRB<br>0.5    | ALB<br>0.5<br>TRB<br>0.5    | ALB<br>0.25<br>TRB<br>0.5    | ALB<br>0.125<br>TRB<br>0.5    | TRB<br>0.5    |
| E | NC | ALB<br>64.0<br>TRB<br>0.25   | ALB<br>32.0<br>TRB<br>0.25   | ALB<br>16.0<br>TRB<br>0.25   | ALB<br>8.0<br>TRB<br>0.25   | ALB<br>4.0<br>TRB<br>0.25   | ALB<br>2.0<br>TRB<br>0.25   | ALB<br>1.0<br>TRB<br>0.25   | ALB<br>0.5<br>TRB<br>0.25   | ALB<br>0.25<br>TRB<br>0.25   | ALB<br>0.125<br>TRB<br>0.25   | TRB<br>0.25   |
| F | NC | ALB<br>64.0<br>TRB<br>0.125  | ALB<br>32.0<br>TRB<br>0.125  | ALB<br>16.0<br>TRB<br>0.125  | ALB<br>8.0<br>TRB<br>0.125  | ALB<br>4.0<br>TRB<br>0.125  | ALB<br>2.0<br>TRB<br>0.125  | ALB<br>1.0<br>TRB<br>0.125  | ALB<br>0.5<br>TRB<br>0.125  | ALB<br>0.25<br>TRB<br>0.125  | ALB<br>0.125<br>TRB<br>0.125  | TRB<br>0.125  |
| G | NC | ALB<br>64.0<br>TRB<br>0.0625 | ALB<br>32.0<br>TRB<br>0.0625 | ALB<br>16.0<br>TRB<br>0.0625 | ALB<br>8.0<br>TRB<br>0.0625 | ALB<br>4.0<br>TRB<br>0.0625 | ALB<br>2.0<br>TRB<br>0.0625 | ALB<br>1.0<br>TRB<br>0.0625 | ALB<br>0.5<br>TRB<br>0.0625 | ALB<br>0.25<br>TRB<br>0.0625 | ALB<br>0.125<br>TRB<br>0.0625 | TRB<br>0.0625 |
| H | NC | ALB<br>64.0                  | ALB<br>32.0                  | ALB<br>16.0                  | ALB<br>8.0                  | ALB<br>4.0                  | ALB<br>2.0                  | ALB<br>1.0                  | ALB<br>0.5                  | ALB<br>0.25                  | ALB<br>0.125                  | PC            |

NC: Negative control (culture medium only)

PC: Positive control (culture medium and fungal inoculum, no drugs)

**Figure S1.** Layout of chequerboard plates used in synergism assays with the concentrations of drugs tested in the different wells. **(A)** Combination albendazole and itraconazole; **(B)** combination albendazole and terbinafine.
